# Supplementary material for: Structure, molecular dynamics, and interactions in aqueous xylitol solutions
Source: Royal Society of Chemistry journal article supplement (doi:10.1039/c9cp04547c), 2019-01-01
Supplement: c9cp04547c1.pdf [file c9cp04547c1.pdf]

**Electronic Supplementary Information (ESI)**

**Structure, molecular dynamics and interactions in aqueous xylitol solutions**

Iwona Plowas-Korus,<sup>\*a</sup> Richard Buchner<sup>b</sup>

*<sup>a</sup>Institute of Molecular Physics, Polish Academy of Sciences, M. Smoluchowskiego 17, 60-179  
Poznań, Poland; E-mail: iwplowas@ifmpan.poznan.pl*

*<sup>b</sup>Institut für Physikalische und Theoretische Chemie, Universität Regensburg, 93040  
Regensburg, Germany.*

**Table S1.** Densities,  $d$ , viscosities,  $\eta$ , and parameters of the 5D model for the dielectric spectra of aqueous xylitol solutions at 25 °C: static permittivity,  $\epsilon_s$ , high-frequency permittivity,  $\epsilon_\infty$ , amplitudes,  $S_j$ , and relaxation times,  $\tau_j$ , of the resolved modes  $j = 1...5$ . Bold font indicates fixed parameter values.

| $c / M$ | $d / g \cdot cm^{-3}$ | $\eta / mPa \cdot s$ | $\epsilon_s$ | $\epsilon_\infty$ | $S_1$ | $\tau_1 / ps$ | $S_2$ | $\tau_2 / ps$ | $S_3$ | $\tau_3 / ps$ | $S_4$ | $\tau_4 / ps$ | $S_5$ | $\tau_5 / ps$ |
|---------|-----------------------|----------------------|--------------|-------------------|-------|---------------|-------|---------------|-------|---------------|-------|---------------|-------|---------------|
| 0.100   | 1.0021                | 0.913                | 78.11        | <b>3.52</b>       |       |               | 1.14  | <b>21.9</b>   | 70.99 | 8.39          |       |               | 2.46  | <b>0.278</b>  |
| 0.200   | 1.0072                | 0.951                | 77.80        | <b>3.52</b>       |       |               | 2.29  | <b>22.3</b>   | 69.53 | 8.48          |       |               | 2.46  | <b>0.278</b>  |
| 0.400   | 1.0171                | 1.029                | 77.48        | <b>3.52</b>       |       |               | 4.48  | <b>23.0</b>   | 66.65 | 8.67          |       |               | 2.83  | <b>0.278</b>  |
| 0.800   | 1.0370                | 1.23                 | 76.56        | <b>3.52</b>       |       |               | 8.79  | <b>24.5</b>   | 61.07 | 9.10          |       |               | 3.19  | <b>0.278</b>  |
| 1.206   | 1.0572                | 1.48                 | 75.79        | <b>3.52</b>       | 0.73  | 186           | 12.59 | 22.8          | 55.50 | 9.50          |       |               | 3.46  | <b>0.278</b>  |
| 1.611   | 1.0767                | 1.82                 | 74.24        | <b>3.52</b>       | 1.44  | 109           | 15.61 | 27.9          | 48.20 | 10.6          | 2.63  | <b>4.0</b>    | 2.84  | <b>0.278</b>  |
| 2.011   | 1.0961                | 2.25                 | 73.30        | <b>3.52</b>       | 2.75  | 105           | 19.34 | 28.7          | 41.99 | 11.3          | 3.17  | <b>3.5</b>    | 2.53  | <b>0.278</b>  |
| 2.181   | 1.1043                | 2.48                 | 72.85        | <b>3.52</b>       | 3.35  | 99            | 21.95 | 28.4          | 38.06 | 11.3          | 3.23  | 4.46          | 2.73  | <b>0.278</b>  |
| 2.388   | 1.1150                | 2.83                 | 72.22        | <b>3.52</b>       | 3.58  | 111           | 22.74 | 30.8          | 36.27 | 11.8          | 3.33  | 4.36          | 2.78  | <b>0.278</b>  |
| 2.816   | 1.1362                | 3.76                 | 70.98        | <b>3.52</b>       | 5.69  | 112           | 27.60 | 31.5          | 27.70 | 11.9          | 3.54  | <b>5.9</b>    | 2.92  | <b>0.278</b>  |
| 3.251   | 1.1579                | 5.12                 | 69.51        | <b>3.52</b>       | 8.48  | 116           | 29.54 | 33.5          | 21.56 | 12.5          | 3.76  | <b>5.2</b>    | 2.66  | <b>0.278</b>  |

**Table S2.** Parameters  $a_i$  of  $n^{\text{th}}$  order polynomials,  $\sum a_i \times c^i$  ( $0 \leq i \leq n$ ), fitting density,  $d$ , static permittivity,  $\varepsilon_s$ , amplitudes  $S_2$  &  $S_4$  (Table S1), and  $S_s$  &  $S_b$  (see main text), as well as relaxation times  $\tau_2$  and  $\tau_3$  (Table S1) as a function of concentration,  $c$ , of aqueous xylitol solutions at 298.15 K.<sup>a</sup>

|                                   | $n$ | $a_0$                     | $a_1$           | $a_2$        |
|-----------------------------------|-----|---------------------------|-----------------|--------------|
| $d / \text{kg}\cdot\text{L}^{-1}$ | 2   | 0.99727±0.00013           | 0.04931±0.00008 |              |
| $\varepsilon_s$                   | 2   | <b>78.368<sup>b</sup></b> | -2.143±0.082    | -0.178±0.032 |
| $S_2$                             | 2   | <b>0</b>                  | 10.96±0.35      | -0.53±0.14   |
| $S_4$                             | 2   | <b>0</b>                  | 2.154±0.055     | -0.311±0.021 |
| $S_s$                             | 1   | <b>0</b>                  | 7.560±0.083     |              |
| $S_b$                             | 1   | <b>74.848<sup>b</sup></b> | -15.38±0.10     |              |
| $\tau_2/\text{ps}$                | 1   | 21.6±1.24                 | 3.61±0.51       |              |
| $\tau_3/\text{ps}$                | 1   | <b>8.35<sup>b</sup></b>   | 1.310±0.040     |              |

<sup>a</sup> $S_1 = (0.471 \pm 0.059) \times c^{(2.44 \pm 0.12)}$  with  $c$  in M; <sup>b</sup>ref [1]; bold font indicates fixed parameter.

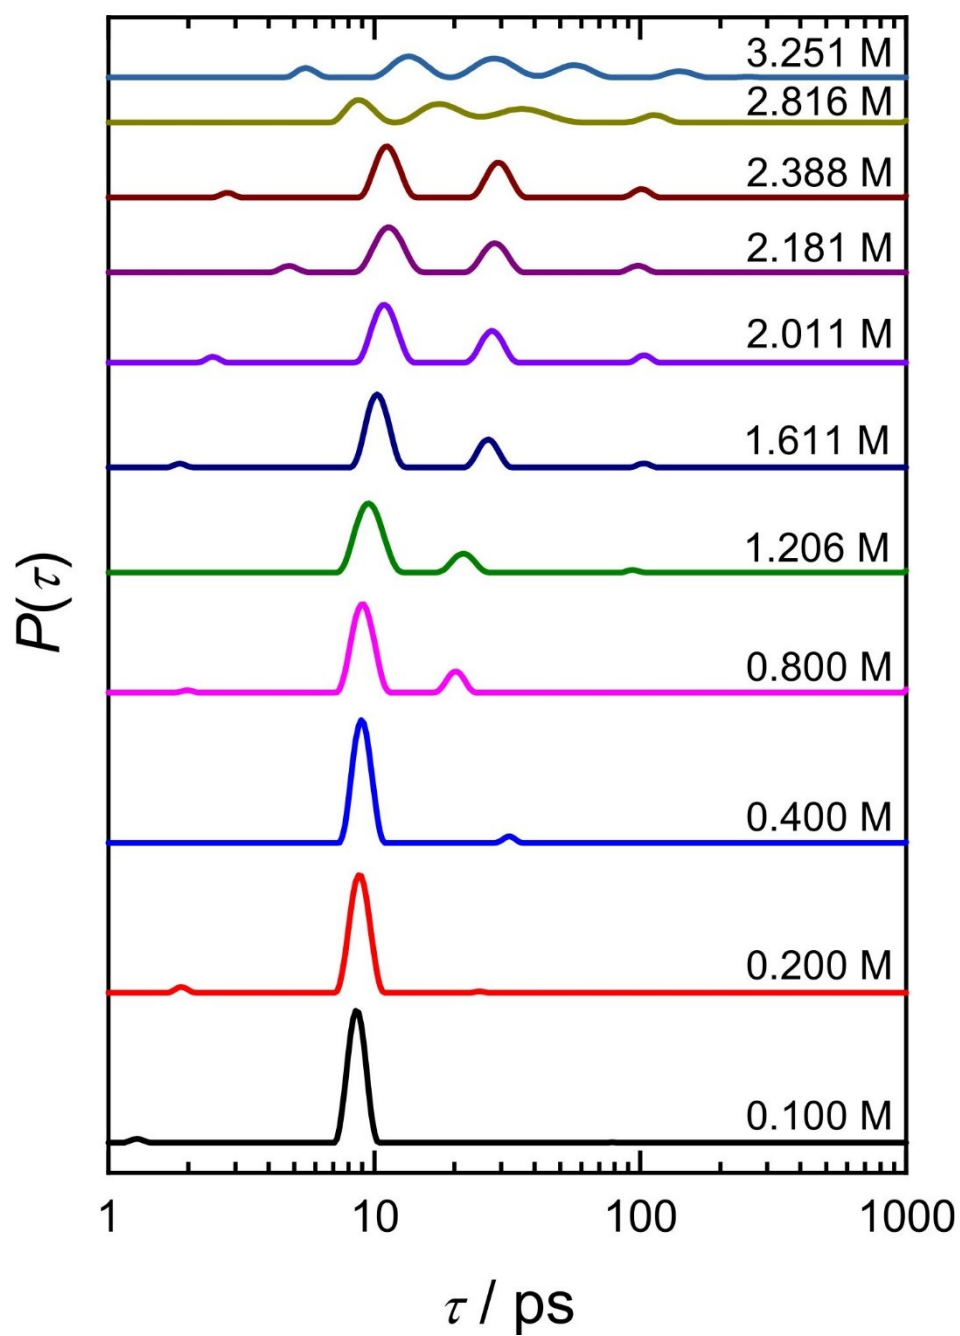

**Fig. S1.** Relaxation-time probability functions,  $P(\tau)$ ,<sup>2</sup> for the investigated aqueous xylitol solutions at 25 °C.

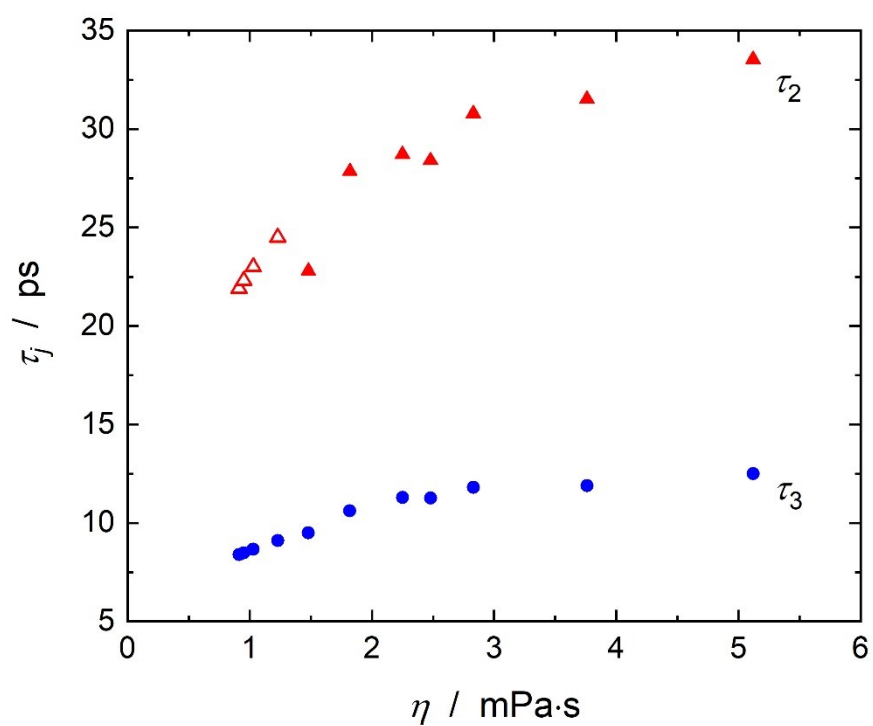

**Fig. S2.** Water-related relaxation times,  $\tau_2$  ( $\blacktriangle$ ) and  $\tau_3$  ( $\bullet$ ), as a function of solution viscosity,  $\eta$ , for aqueous xylitol solutions at 298.15 K.

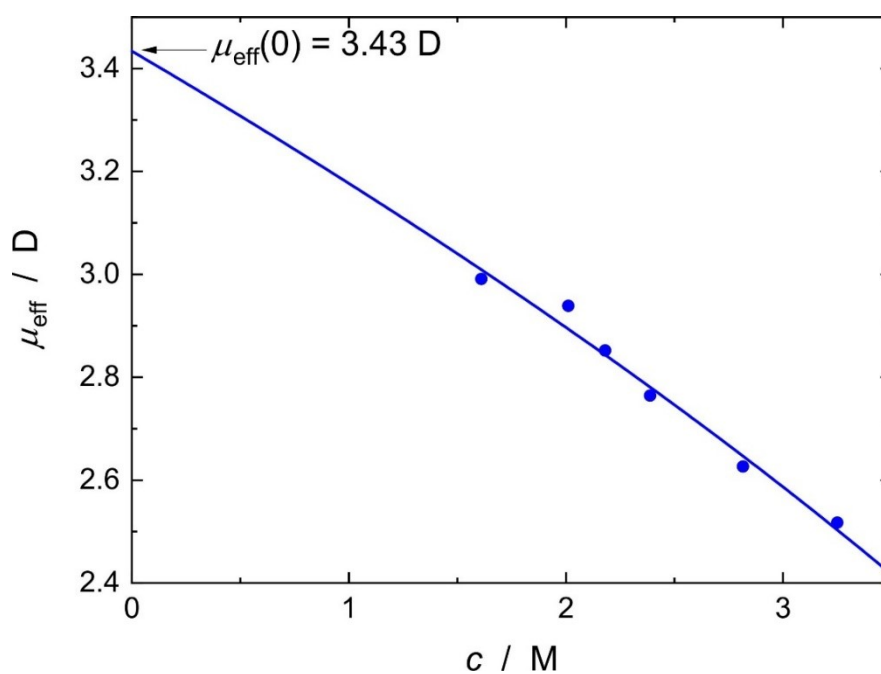

**Fig. S3.** Effective dipole moment,  $\mu_{\text{eff}}$  ( $\bullet$ ), of an OH group of xylitol calculated from the amplitude  $S_4$  of Table S1. The line was obtained with the polynomial fitting  $S_4$  (Table S2).

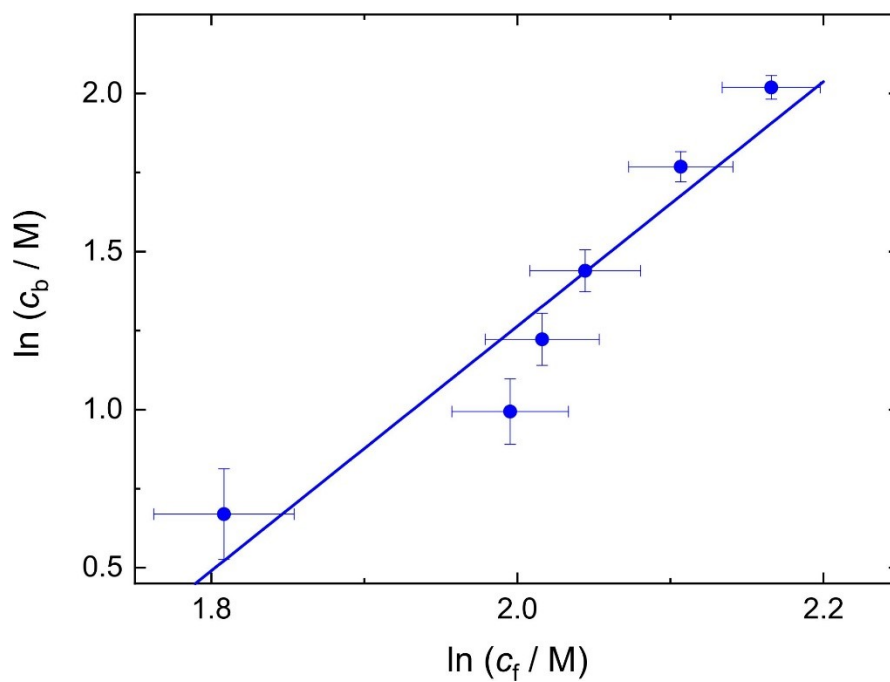

**Fig. S4.** Concentration of bound xylitol hydroxy groups,  $c_b$  (●), as a function of the concentration of free xylitol hydroxy groups,  $c_f$ , and associated fit with eqn. 3 (line).

## Notes and references

1. A. Eiberweiser, A. Nazet, G. Hefter, and R. Buchner, *J. Phys. Chem. B*, 2015, **119**, 5270-5281.
2. A. Y. Zasetzky and R. Buchner, *J. Phys.: Condens. Matter*, 2011, **23**, 025903.
